# Supplementary material for: Evaluation of Pre-Pandemic Trivalent COBRA HA Vaccine in Mice Pre-Immune to Historical H1N1 and H3N2 Influenza Viruses
Source: MDPI journal article supplement (doi:10.3390/v15010203), 2023-01-11
Supplement: s1 [file s1]

# Evaluation of pre-pandemic trivalent COBRA HA vaccine in mice pre-immune to historical H1N1 and H3N2 influenza viruses

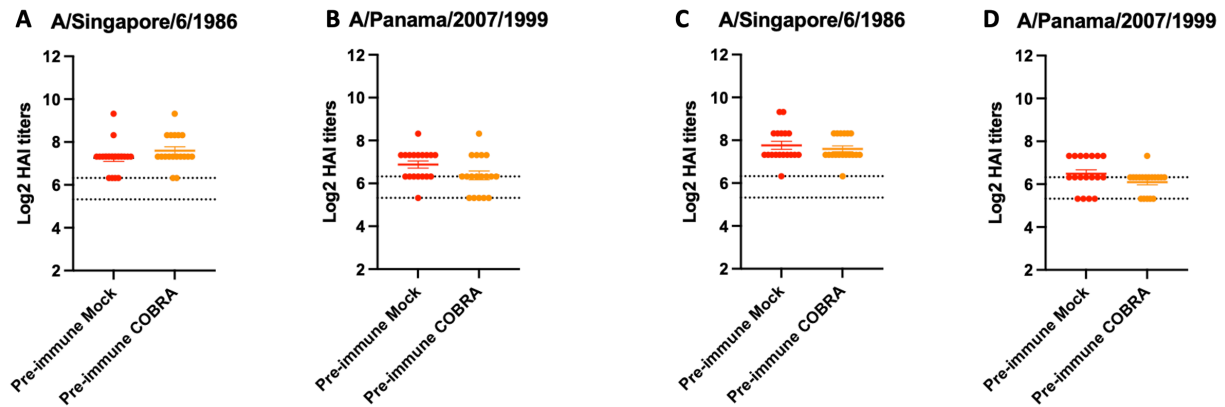

**Figure S1** Pre-immune mice seroconversion to H1N1 and H3N2 strains. HAI titers were tested on the serum collected 14 days after mice intranasally inoculated with equal concentrations of A/Singapore/6/1986/H1N1 and A/Panama/2007/1999/H3N2 viruses. **A,B** are results of mice in Pre-immune Mock and Pre-immune COBRA groups later being challenged with A/Mallard/Minnesota/2008/H2N3 virus. **C,D** are results of mice in Pre-immune Mock and Pre-immune COBRA groups later being challenged with A/Sichuan/26221/2014/H5N6. **A,C** are HAI titers against A/Singapore/6/1986/H1N1. **B,D** are HAI titers against A/Panama/2007/1999/H3N2. Top and bottom dash lines represents HAI of 1:80 and 1:40. N= 18 per group in each experiment.

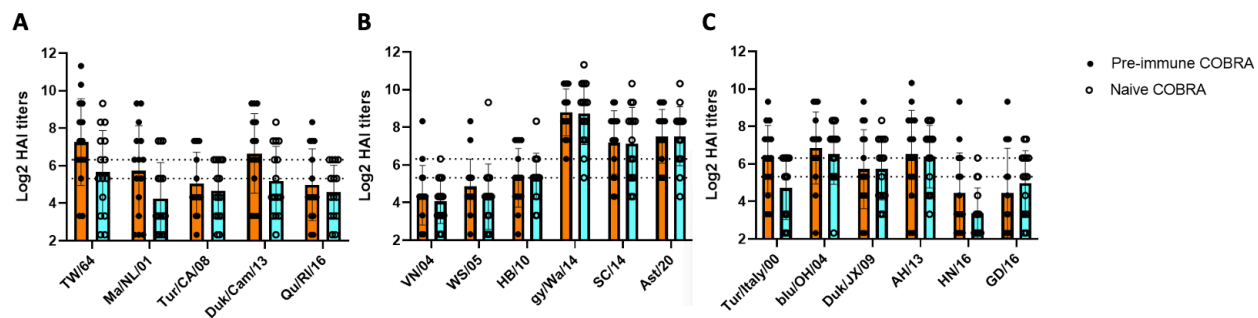

**Figure S2** H1/ H3 pre-immunity does not affect H2/H5/H7 HAI titers after two COBRA rHA vaccinations. HAI activities from both COBRA vaccinated groups were compared. H2 (**A**), H5 (**B**), H7 (**C**) HAI titers are shown. Solid dots in orange bars represent mice in Pre-immune COBRA group, hollow dots in blue bars represent mice in Naive COBRA group. N= 15 per group in each group.

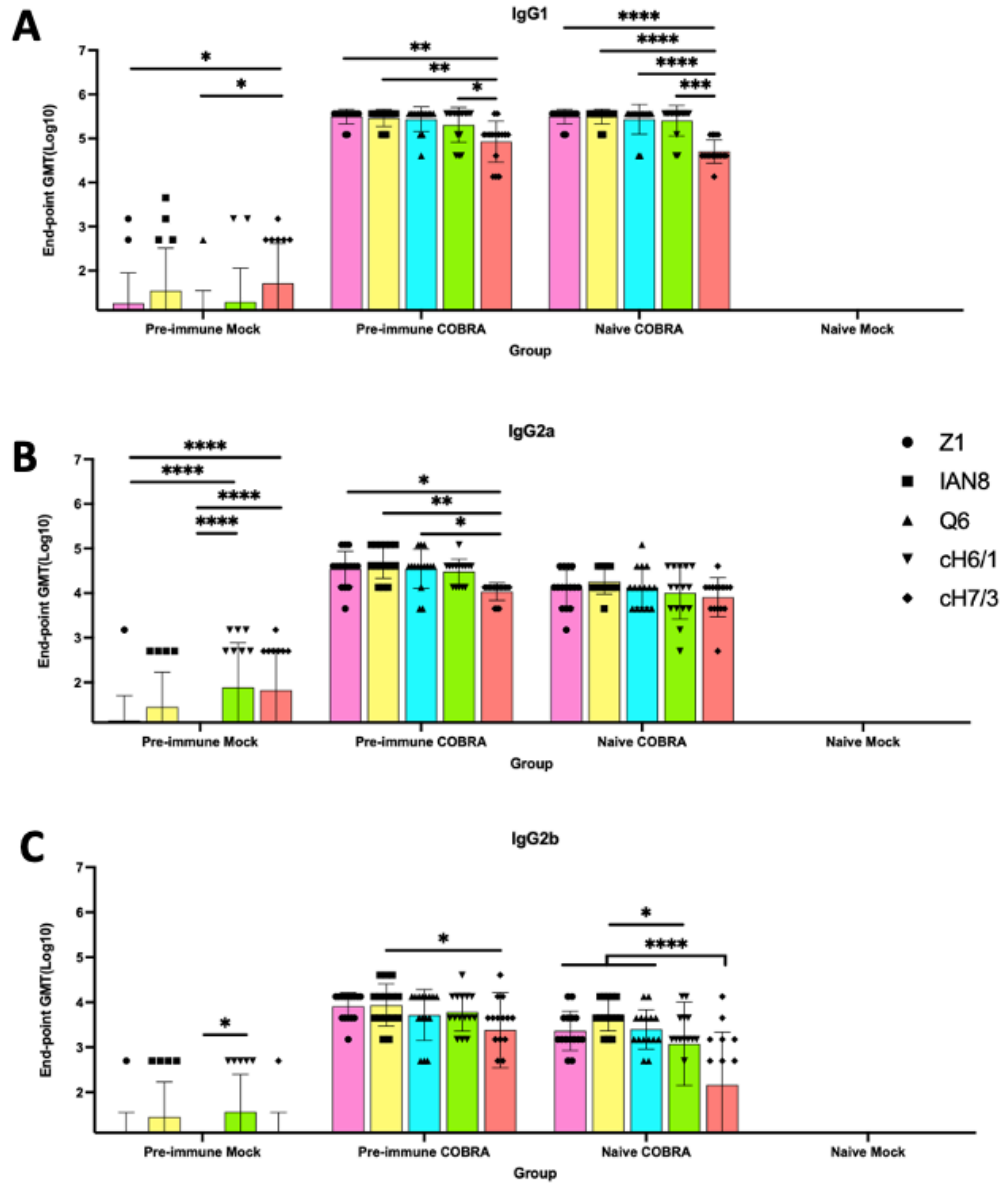

**Figure S3** COBRA HA vaccinations elicit high IgG1, IgG2a and IgG2b. Serum from DBA2/J mice collected 2 and 3 weeks after boost vaccination was used to determine anti-Z1, anti-IAN8, anti-Q6, anti-cH6/1, anti-cH7/3 endpoint titer in each group. IgG1 (A), IgG2a (B), IgG2b (C) endpoint titers are shown. Data shown is mean  $\pm$  SEM, n= 15 per group in each experiment; \*P<0.05, \*\*P<0.01, \*\*\*P<0.001, \*\*\*\*P<0.0001 (two-way ANOVA with Turkey's post-test in panels A, B, C).

| Group            | Mouse ID | D7 BW % in H2 challenge | H2 (≥1:40) | H5 (≥1:40) | H7 (≥1:40) | total |
|------------------|----------|-------------------------|------------|------------|------------|-------|
| Pre-immune COBRA | 61       | 99.61%                  | 3/5        | 5/6        | 4/6        | 12/17 |
|                  | 62       | 99.20%                  | 1/5        | 4/6        | 4/6        | 9/17  |
|                  | 63       | 93.66%                  | 5/5        | 2/6        | 6/6        | 13/17 |
|                  | 64       | 94.61%                  | 2/5        | 6/6        | 1/6        | 9/17  |
|                  | 65       | 100.75%                 | 5/5        | 4/6        | 5/6        | 14/17 |
|                  | 66       | 97.10%                  | 2/5        | 3/6        | 1/6        | 6/17  |
| Naïve COBRA      | 91       | 91.38%                  | 2/5        | 5/6        | 4/6        | 11/17 |
|                  | 92       | 89.33%                  | 3/5        | 4/6        | 3/6        | 10/17 |
|                  | 93       | 98.06%                  | 0/5        | 3/6        | 4/6        | 7/17  |
|                  | 94       | 87.80%                  | 2/5        | 5/6        | 4/6        | 11/17 |
|                  | 95       | 95.49%                  | 1/5        | 5/6        | 4/6        | 10/17 |
|                  | 96       | 100%                    | 4/5        | 5/6        | 5/6        | 14/17 |
| Group            | Mouse ID | D7 BW % in H5 challenge | H2 (≥1:40) | H5 (≥1:40) | H7 (≥1:40) | total |
| Pre-immune COBRA | 181      | 99.25%                  | 3/5        | 4/6        | 4/6        | 11/17 |
|                  | 182      | 94.07%                  | 1/5        | 5/6        | 4/6        | 10/17 |
|                  | 183      | 90.66%                  | 5/5        | 2/6        | 6/6        | 13/17 |
|                  | 184      | 95.08%                  | 2/5        | 6/6        | 1/6        | 9/17  |
|                  | 185      | 102.22%                 | 5/5        | 4/6        | 5/6        | 14/17 |
|                  | 186      | 100%                    | 2/5        | 3/6        | 1/6        | 6/17  |
| Naïve COBRA      | 211      | 92.78%                  | 2/5        | 5/6        | 4/6        | 11/17 |
|                  | 212      | 104.23%                 | 3/5        | 4/6        | 3/6        | 10/17 |
|                  | 213      | 92.08%                  | 0/5        | 3/6        | 4/6        | 7/17  |
|                  | 214      | 100%                    | 2/5        | 5/6        | 4/6        | 11/17 |
|                  | 215      | 91.59%                  | 1/5        | 5/6        | 4/6        | 10/17 |
|                  | 216      | 99.36%                  | 4/5        | 5/6        | 5/6        | 14/17 |

**Table S1** Body weight change and number of strains be recognized in each HAI panel of mice in both Pre-immune COBRA and Naïve COBRA groups. Top and bottom sections are mice in H2 and H5 challenge, respectively. N=5 in H2 HAI panel, N=6 in H5 HAI panel, N=6 in H7 HAI panel, total N=17.
